# Supplementary material for: Isolation of β-1,3-Glucanase-Producing Microorganisms from Poria cocos Cultivation Soil via Molecular Biology
Source: PubMed Central journal article supplement (PMC6100237; doi:10.3390/molecules23071555), 2018-06-27
Supplement: molecules-23-01555-s001.pdf [file molecules-23-01555-s001.pdf]

# Isolation of $\beta$ -1,3-Glucanase-Producing Microorganisms from *Poria cocos* Cultivation Soil via Molecular Biology

Qiulan Wu, Xin Dou, Qi Wang, Zhengbing Guan, Yujie Cai and Xiangru Liao \*

The Key Laboratory of Industrial Biotechnology, Ministry of Education, School of Biotechnology, Jiangnan University, 1800 Lihu Road, Wuxi, Jiangsu 214122, China; 15861667099@163.com (Q.W.); xin\_dou@163.com (X.D.); zhiwen\_wei@126.com (Q.W.); 15061886046@163.com (Z.G.); xjj491202524@126.com (Y.C.);

\* Correspondence: xrliao@jiangnan.edu.cn; Tel.: +86-1377-1104-596; Fax: +86-0551-8532-7725

Received: 17 May 2018; Accepted: 26 June 2018; Published: date

## Supporting information

### Richness rarefaction plot

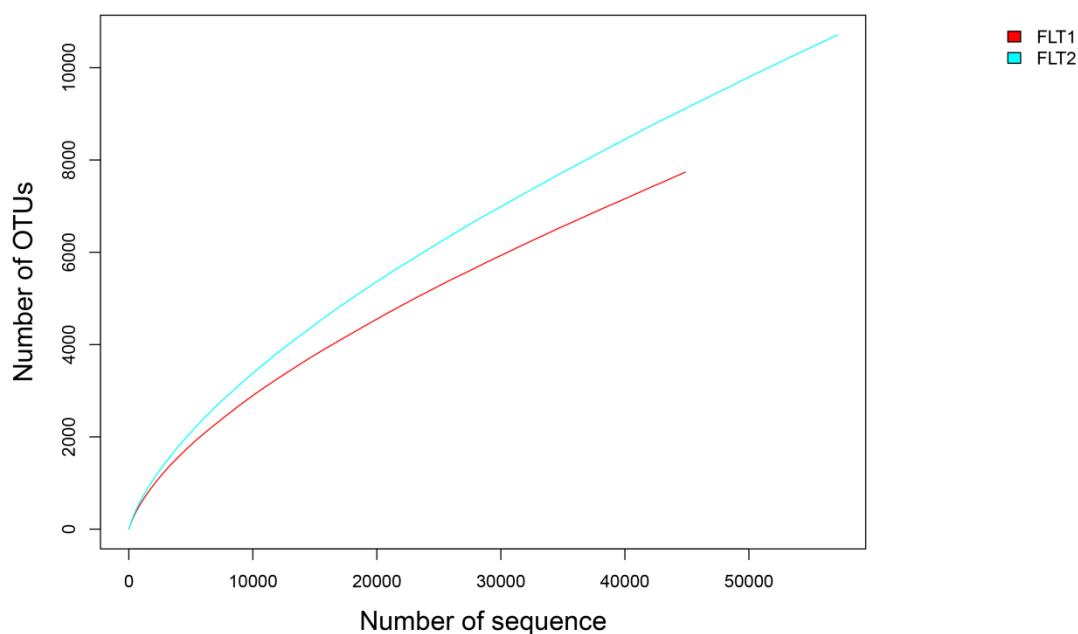

**Figure S1.** Rarefaction curves based on the OTUs at the cutoff of 97% 16S rRNA sequence similarity.

**Table S1.** Relative abundances (% of total good-quality sequences) of all phyla in each soil sample.

The dominant phyla were marked in shade (>1% of good quality sequences in at least one sample), and the total abundances in each soil sample are displayed at the bottom of the latter two lines.

| Phylum                | FLT <sub>1</sub> (%) | FLT <sub>2</sub> (%) |
|-----------------------|----------------------|----------------------|
| <i>Proteobacteria</i> | 42.08                | 47.77                |
| <i>Actinobacteria</i> | 18.64                | 12.60                |
| <i>Acidobacteria</i>  | 12.41                | 13.58                |
| <i>Bacteroidetes</i>  | 5.95                 | 8.00                 |

|                                                 |              |              |
|-------------------------------------------------|--------------|--------------|
| <i>Verrucomicrobia</i>                          | 4.30         | 3.80         |
| <i>Firmicutes</i>                               | 3.81         | 2.63         |
| <i>Gemmatimonadetes</i>                         | 2.80         | 1.61         |
| <i>Chloroflexi</i>                              | 2.14         | 1.06         |
| <i>Planctomycetes</i>                           | 2.01         | 2.27         |
| <i>candidate division WPS-1</i>                 | 1.25         | 0.33         |
| <i>Candidatus Saccharibacteria</i>              | 0.74         | 1.30         |
| <i>Nitrospirae</i>                              | 0.47         | 0.51         |
| <i>Parcubacteria</i>                            | 0.21         | 0.79         |
| BRC1                                            | 0.16         | 0.02         |
| <i>Latescibacteria</i>                          | 0.14         | 0.13         |
| <i>Chlamydiae</i>                               | 0.10         | 0.46         |
| <i>Armatimonadetes</i>                          | 0.10         | 0.15         |
| <i>Synergistetes</i>                            | 0.07         | 0.02         |
| <i>Cyanobacteria</i>                            | 0.06         | 0.06         |
| <i>Euryarchaeota</i>                            | 0.04         | 0.01         |
| <i>Fibrobacteres</i>                            | 0.03         | 0.08         |
| <i>candidate division WPS-2</i>                 | 0.02         | 0.75         |
| <i>Elusimicrobia</i>                            | 0.02         | 0.18         |
| <i>Deinococcus-Thermus</i>                      | 0.01         | 0.03         |
| <i>Aquificae</i>                                | 0.01         | 0.02         |
| <i>Thaumarchaeota</i>                           | 0.01         | 0.01         |
| <i>Ignavibacteriae</i>                          | 0.01         | 0.01         |
| <i>Hydrogenedentes</i>                          | 0.01         | 0.00         |
| <i>Spirochaetes</i>                             | 0.00         | 0.15         |
| <i>Crenarchaeota</i>                            | 0.00         | 0.01         |
| <i>Fusobacteria</i>                             | 0.00         | 0.00         |
| <i>Thermodesulfobacteria</i>                    | 0.00         | 0.00         |
| <i>Thermotogae</i>                              | 0.00         | 0.00         |
| <i>candidate division ZB3</i>                   | 0.00         | 0.00         |
| <b>The percentage of dominant phyla</b>         | <b>96.13</b> | <b>94.95</b> |
| <b>The percentage of total identified phyla</b> | <b>97.60</b> | <b>98.36</b> |

**Table S2.** The abundance of taxa genus levels in soil samples. The taxa represented within the top 30 abundance at the taxa genus levels and beyond the top 30 abundance at the taxa genus levels were classified into others.

| FLT <sub>1</sub>    |           | FLT <sub>2</sub>    |           |
|---------------------|-----------|---------------------|-----------|
| Genus               | Score (%) | Genus               | Score (%) |
| unclassified        | 13.90     | unclassified        | 13.90     |
| <i>Sphingomonas</i> | 9.56      | <i>Burkholderia</i> | 3.19      |
| Gp4                 | 5.33      | Gp1                 | 2.98      |
| <i>Gaiella</i>      | 4.63      | <i>Sphingomonas</i> | 2.54      |

|                                                 |              |                                                 |              |
|-------------------------------------------------|--------------|-------------------------------------------------|--------------|
| <i>Massilia</i>                                 | 3.81         | Gp2                                             | 2.37         |
| <i>Gemmatimonas</i>                             | 2.80         | <i>Mucilaginibacter</i>                         | 2.34         |
| <i>Glaciimonas</i>                              | 2.50         | <i>Pseudomonas</i>                              | 2.16         |
| <i>Spartobacteria_genera_incertae_sedis</i>     | 2.46         | <i>Massilia</i>                                 | 2.13         |
| Gp6                                             | 1.93         | <i>Gaiella</i>                                  | 1.88         |
| <i>Streptomyces</i>                             | 1.90         | <i>Phenylobacterium</i>                         | 1.77         |
| <i>Pseudomonas</i>                              | 1.76         | <i>Bradyrhizobium</i>                           | 1.68         |
| <i>Burkholderia</i>                             | 1.65         | <i>Gemmatimonas</i>                             | 1.61         |
| <i>Mucilaginibacter</i>                         | 1.42         | <i>Subdivision3_genera_incertae_sedis</i>       | 1.56         |
| <i>WPS-1_genera_incertae_sedis</i>              | 1.25         | Gp3                                             | 1.52         |
| <i>Aciditerrimonas</i>                          | 1.23         | <i>Saccharibacteria_genera_incertae_sedis</i>   | 1.30         |
| <i>Bacillus</i>                                 | 1.12         | <i>Geothrix</i>                                 | 1.28         |
| <i>Novosphingobium</i>                          | 1.11         | <i>Spartobacteria_genera_incertae_sedis</i>     | 1.26         |
| <i>Subdivision3_genera_incertae_sedis</i>       | 1.05         | <i>Labilithrix</i>                              | 1.25         |
| Gp1                                             | 1.01         | <i>Rhizomicrobium</i>                           | 1.24         |
| Gp16                                            | 0.90         | <i>Nevskia</i>                                  | 1.24         |
| <i>Conexibacter</i>                             | 0.87         | <i>Chryseolinea</i>                             | 1.21         |
| <i>Alkanindiges</i>                             | 0.84         | Gp6                                             | 1.15         |
| Gp3                                             | 0.82         | <i>Kofleria</i>                                 | 1.03         |
| <i>Thermoleophilum</i>                          | 0.82         | <i>Arthrobacter</i>                             | 0.96         |
| <i>Bradyrhizobium</i>                           | 0.79         | <i>Marmoricola</i>                              | 0.85         |
| <i>Arthrobacter</i>                             | 0.78         | <i>Candidatus Koribacter</i>                    | 0.81         |
| <i>Ramlibacter</i>                              | 0.78         | <i>Parcubacteria_genera_incertae_sedis</i>      | 0.79         |
| <i>Saccharibacteria_genera_incertae_sedis</i>   | 0.74         | <i>Aciditerrimonas</i>                          | 0.77         |
| <i>Phenylobacterium</i>                         | 0.73         | <i>Nocardioides</i>                             | 0.75         |
| <i>Solirubrobacter</i>                          | 0.69         | <i>WPS-2_genera_incertae_sedis</i>              | 0.75         |
| <b>others</b>                                   | <b>30.31</b> | <b>others</b>                                   | <b>41.53</b> |
| <b>The percentage of total identified genus</b> | <b>86.1</b>  | <b>The percentage of total identified genus</b> | <b>86.1</b>  |
